# Supplementary material for: Ultrasmall polymersomes of poly-α,β-(N-2-hydroxyethyl l-aspartamide)-graft-poly(l-lactic acid) copolymers as a potential drug carrier
Source: Royal Society of Chemistry journal article supplement (doi:10.1039/c6ra13675c), 2016-01-01
Supplement: c6ra13675c1.pdf [file c6ra13675c1.pdf]

## Electronics Supplementary Information (ESI)

---

### Ultrasmall Polymersomes of Poly- $\alpha,\beta$ -(N-2-Hydroxyethyl L-Aspartamide)-graft-Poly(L-Lactic Acid) Copolymers as a Potential Drug Carrier

Hyun Jin Lee,<sup>a</sup> Seung-Hae Kwon<sup>b</sup> and Kwang-Suk Jang<sup>\*c</sup>

<sup>a</sup>Department of Chemical & Biomolecular Engineering, Korea Advanced Institute of Science and Technology, Daejeon 34141, Republic of Korea

<sup>b</sup>Division of Bio-imaging, Korea Basic Science Institute, Chun-Cheon 24341, Republic of Korea

<sup>c</sup>Department of Chemical Engineering and Research Center of Chemical Technology, Hankyong National University, Anseong 17579, Republic of Korea

\*E-mail: jang@hknu.ac.kr (K.-S.J.).

---

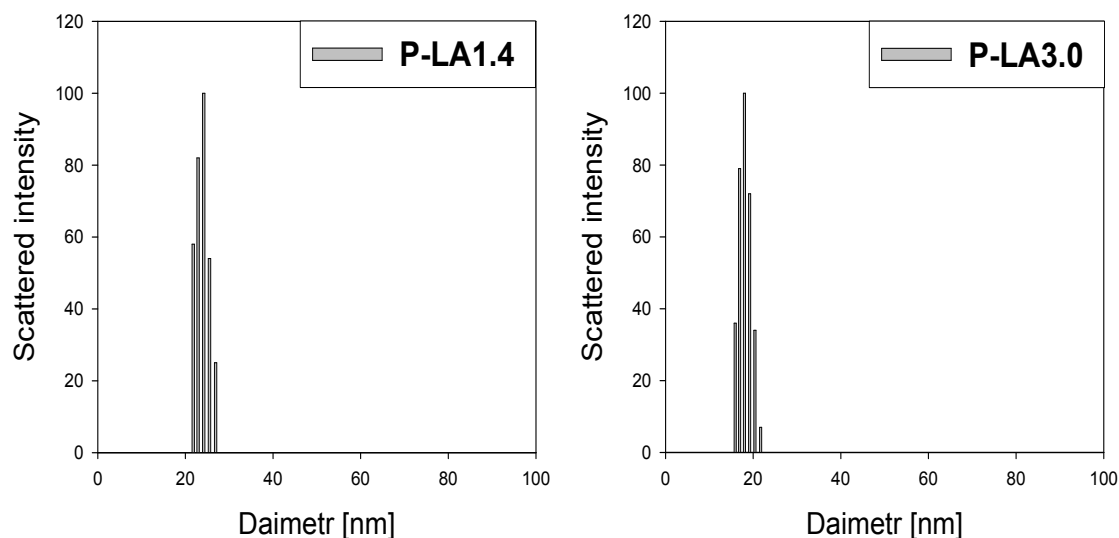

**Fig. S1** Size distributions of PHEA-PLA1.4 and PHEA-PLA3.0 micelles measured by DLS.

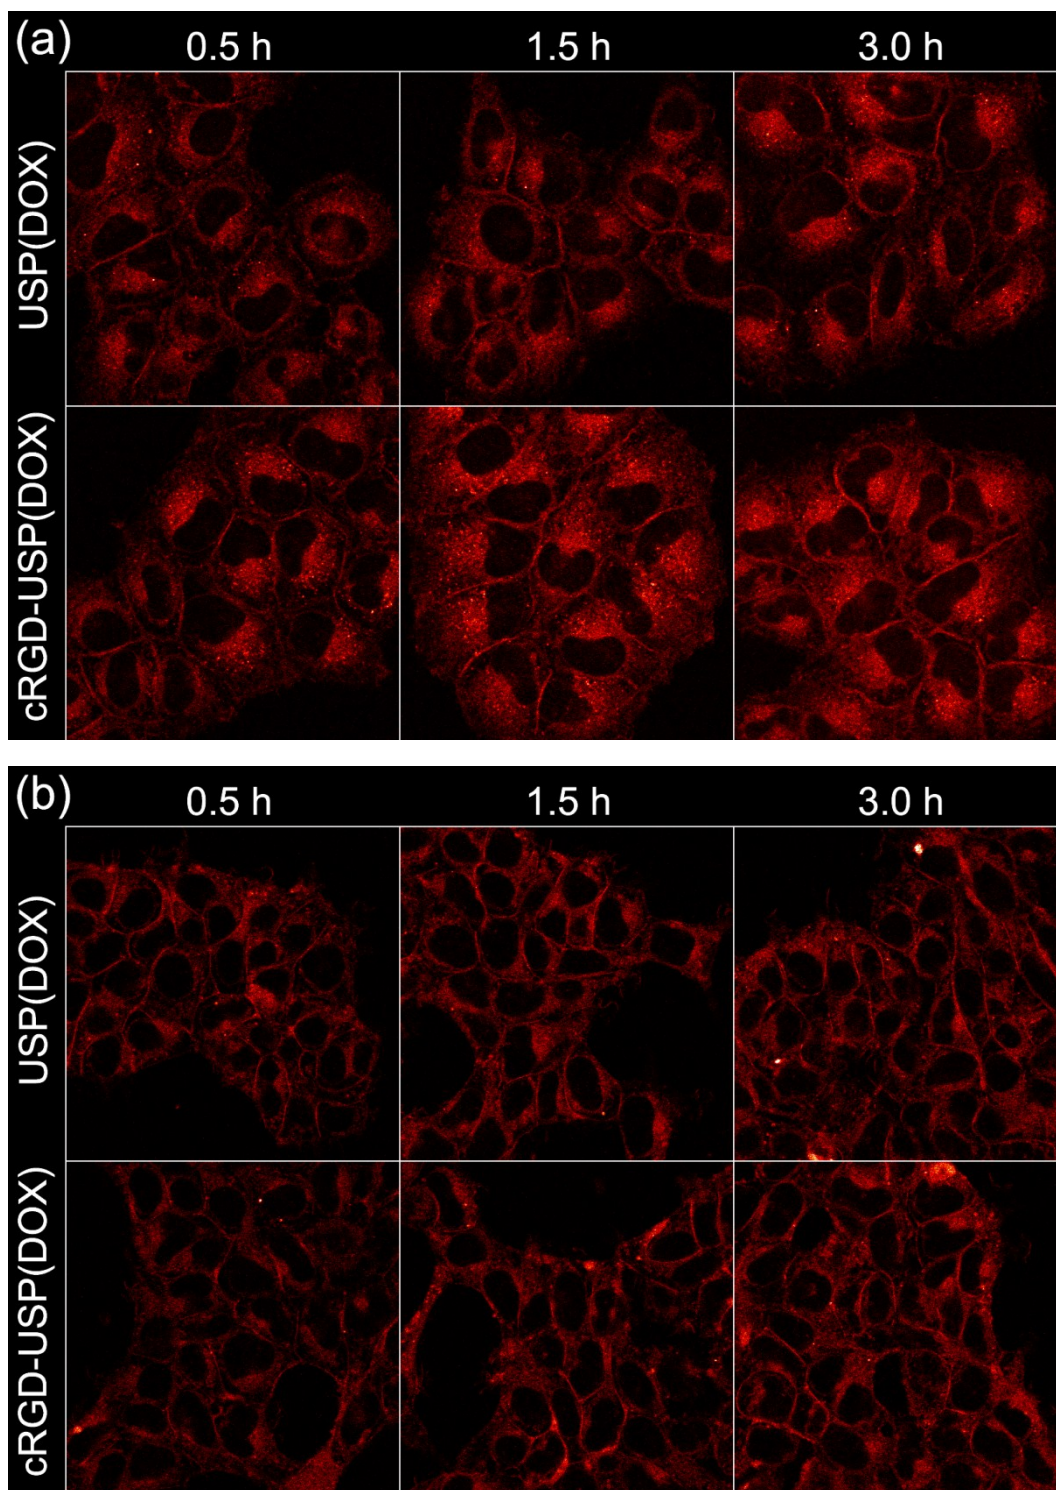

**Fig. S2** CLSM images of (a) integrin  $\alpha_v\beta_3$ -overexpressing HeLa cells and (b) negative control 293T cells incubated with USP(DOX) and cRGD-USOP(DOX) for 0.5, 1.5 and 3.0 h at 37 °C. DOX concentration is 1.0  $\mu\text{g}/\text{mL}$ . Concentrations of USP(DOX) and cRGD-USP(DOX) are 23  $\mu\text{g}/\text{mL}$  and 22  $\mu\text{g}/\text{mL}$ , respectively.

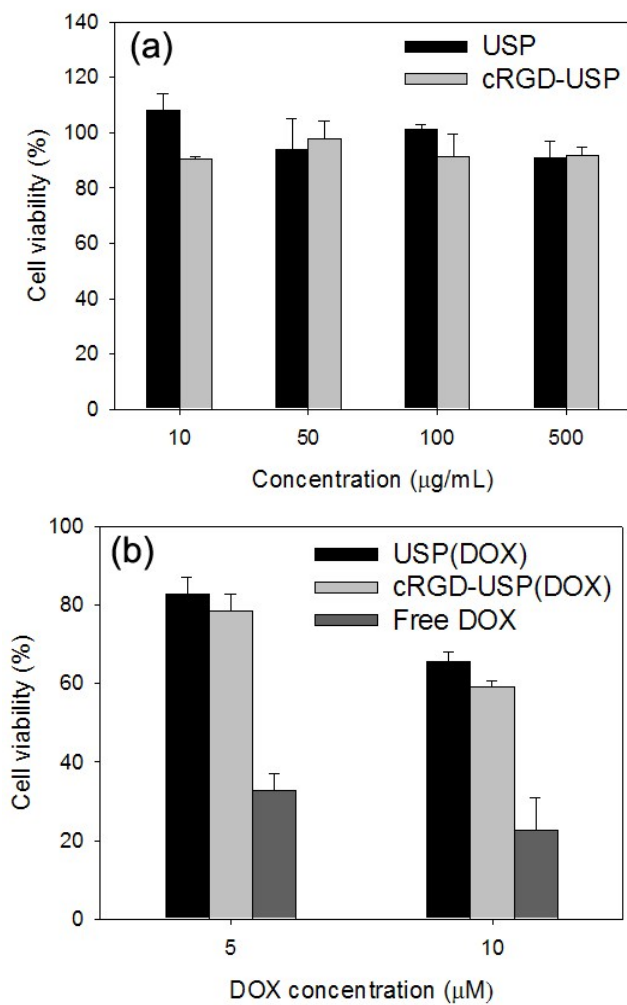

**Fig. S3** (a) Cell viability of HeLa cells incubated with USP (PHEA-g-PLA DS 6.3) and cRGD-USP (PHEA-g-PLA-(cRGDfC)) for 24 h at 37 °C. (b) Cytotoxic effects of USP(DOX) and cRGD-USP(DOX) on HeLa cells after 24 h incubation at 37 °C. 5 µM of DOX: 69.0 µg/mL USP(DOX) or 65.9 µg/mL cRGD-USP(DOX). 10 µM of DOX: 138.1 µg/mL USP(DOX) or 131.8 µg/mL cRGD-USP(DOX).
